# 1 *Fractal complexity of Escherichia coli* 2 *nutrient transport channels is* 3 *influenced by cell shape and growth* 4 *environment*

5  
6 Beatrice Bottura<sup>1</sup>, Liam Rooney<sup>2</sup>, Morgan Feeney<sup>2</sup>, Paul A. Hoskisson<sup>2</sup>, Gail McConnell<sup>2</sup>

7 <sup>1</sup>Department of Physics, SUPA, University of Strathclyde, G4 0NG, Glasgow, UK

8 <sup>2</sup>Strathclyde Institute of Pharmacy and Biomedical Sciences, University of Strathclyde, G4 0RE, Glasgow, UK

9  
10 Recent mesoscopic characterisation of nutrient-transporting channels in *E. coli* has allowed the identification and  
11 measurement of individual channels in whole mature biofilms. However, their complexity under different  
12 physiological and environmental conditions remains unknown. Analysis of confocal micrographs of biofilms formed  
13 by cell shape mutants of *E. coli* shows that channels have a high fractal complexity, regardless of cell phenotype or  
14 growth medium. In particular, biofilms formed by the mutant strain  $\Delta ompR$ , which has a wide-cell phenotype, have  
15 a higher fractal dimension when grown on rich medium than when grown on minimal medium, with channel  
16 complexity affected by glucose and agar concentration in the medium. Osmotic stress leads to a dramatic  
17 reduction in  $\Delta ompR$  cell size, but has a limited effect on channel morphology. This work shows that fractal image  
18 analysis is a powerful tool to quantify the effect of phenotypic mutations and growth environment on the  
19 morphological complexity of internal *E. coli* biofilm structures. If applied to a wider range of mutant strains, this  
20 approach could help elucidate the genetic determinants of channel formation in *E. coli* biofilms.

21

## 22 1. Introduction

23 The formation of spatial patterns is ubiquitous in biological systems, where discrete entities come  
24 together to form complex structures in a process called “morphogenesis” [1]. Bacterial populations are  
25 no exception to this phenomenon: bacterial biofilms exhibit a variety of internal patterns, from surface  
26 and 3D features to complex fractal shapes [2]. Fractal geometry has previously been proposed as a tool  
27 for the investigation of microbial growth patterns [3], and it has since been employed to quantify biofilm  
28 morphology from microscopy images [4]–[6], to describe colony morphogenesis in Gram-negative rod-  
29 shaped bacteria [7] and to analyse nutrient-limited growth patterns [5], [8].

30 In *E. coli*, fractal patterns mostly exist within cellular aggregates of co-cultured isogenic strains  
31 expressing different fluorescent makers [9] [10]. Fractal boundaries are formed during uniaxial cell  
32 growth and division, and can be a result of local instabilities [11]. Alternatively, fractal domains can be  
33 observed between mutant sectors arising from genetic differences in the population [12], where  
34 mutants with a fitness advantage grow faster and gain greater access to nutrients at the periphery of  
35 the colony [13]. Metabolic interactions between isogenic strains can lead to different patterns of self-  
36 organisation, from uniform radial expansion to the formation of dendritic niches at the colony edge [14].

37 Fractal boundaries have also been observed in *E. coli* cocultures of cross-feeding strains, where the type  
38 of social interaction determines the level of spatial mixing between the two strains [15]. The degree of  
39 self-similarity across the boundaries, usually measured through the fractal dimension, depends on the  
40 properties of the constituent cells.

41 The network of nutrient-transporting channels in *E. coli* biofilms [16] also exhibits a complex 3D  
42 morphology. The spatial structure of these emergent channels bears a striking resemblance to the  
43 fractal boundary patterning described in multi-strain co-culture biofilms, although these channels are  
44 not occupied by cells. In previous work, we measured the width of individual channels at different  
45 locations within the biofilm and showed that the channel architecture is affected by environmental  
46 growth conditions [17], but a quantification of channel morphology at the whole-biofilm scale has not  
47 been performed to date.

48 In this study, we quantify the morphological complexity of *E. coli* nutrient-transporting channels using  
49 fractal analysis of confocal microscopy images of biofilms. We hypothesised that their fractal nature  
50 would be affected by the shape of the constituent cells, because channel formation is an emergent  
51 property of biofilm growth. To test this hypothesis, we selected three *E. coli* mutant strains with altered  
52 cell shape phenotypes for morphological analysis. We show that the internal patterns formed by  
53 nutrient-transporting channels in *E. coli* have a fractal complexity comparable to that of computer-  
54 generated fractal images, and that this complexity is affected by cell shape and growth medium. We also  
55 report the specific case of  $\Delta ompR$ , a wide-cell mutant whose biofilm morphological complexity is  
56 particularly affected by growth medium composition.

57

## 58 2. Results

### 59 2.1. Cell shape affects biofilm morphology

60 The single knockout mutants  $\Delta amiA::kan$ ,  $\Delta ompR::kan$  and  $\Delta ydgD::kan$  of the *E. coli* strain BW25113,  
61 hereby referred to as  $\Delta amiA$ ,  $\Delta ompR$  and  $\Delta ydgD$ , were chosen from the Keio collection for their altered  
62 cell shape phenotype (long, wide and wide respectively). The length and width of individual segmented  
63 cells were calculated for each strain from phase-contrast microscopy images (Supplementary Figure 1)  
64 and compared to the measurements of the isogenic parental strain BW25113 for quantitative  
65 phenotypic analysis.  $\Delta amiA$  cells were on average 34% longer than the parental strain, whereas  $\Delta ompR$   
66 and  $\Delta ydgD$  cells were on average 48% and 23% wider than the parental strain respectively.

67 After single-cell phenotypic characterisation, the three mutant strains were grown into mature biofilms  
68 on both LB (rich) and M9/glucose (minimal) solid growth medium (Figure 1). Confocal microscopy of  
69 these biofilms revealed a complex network of intra-colony channels, as previously reported for *E. coli*  
70 JM105 [16], [17]. Biofilms formed on minimal medium exhibited sectoring, with large areas of low  
71 fluorescence intensity across the biofilm volume, and channels appeared less morphologically complex  
72 than in their rich medium counterparts. This was particularly evident in the  $\Delta ompR$  strain, where  
73 channels expand radially outwards in approximately straight lines, reminiscent of strain boundaries  
74 observed between isogenic domains in biofilms formed by spherical mutants of *E. coli* [11]. On rich  
75 medium, channels had more complex arrangements - in particular, channels formed by the  $\Delta amiA$  strain  
76 were made up of long ( $\geq 10 \mu\text{m}$ ) segments, consistent with the long cell phenotype of the constituent

77 cells. Channels formed by the  $\Delta ompR$  mutant strain, on the other hand, appeared fragmented, likely  
78 owing to the constituent cells' irregular morphology.

79 Furthermore, despite both  $\Delta ompR$  and  $\Delta ydgD$  strains having a wide cell phenotype, their biofilms had  
80 different internal morphologies, especially on rich medium. Here  $\Delta ompR$  formed darker channels, which  
81 were clearly distinguishable from the surrounding cells within the biofilm. On minimal medium, the  
82 central region of  $\Delta ydgD$  biofilms appeared devoid of channels, whereas the edges showed radially  
83 expanding channels highly similar to those observed at the edges of  $\Delta ompR$  biofilms. Enlarged regions of  
84 interest showing channel morphology are shown in Supplementary Figure 2.

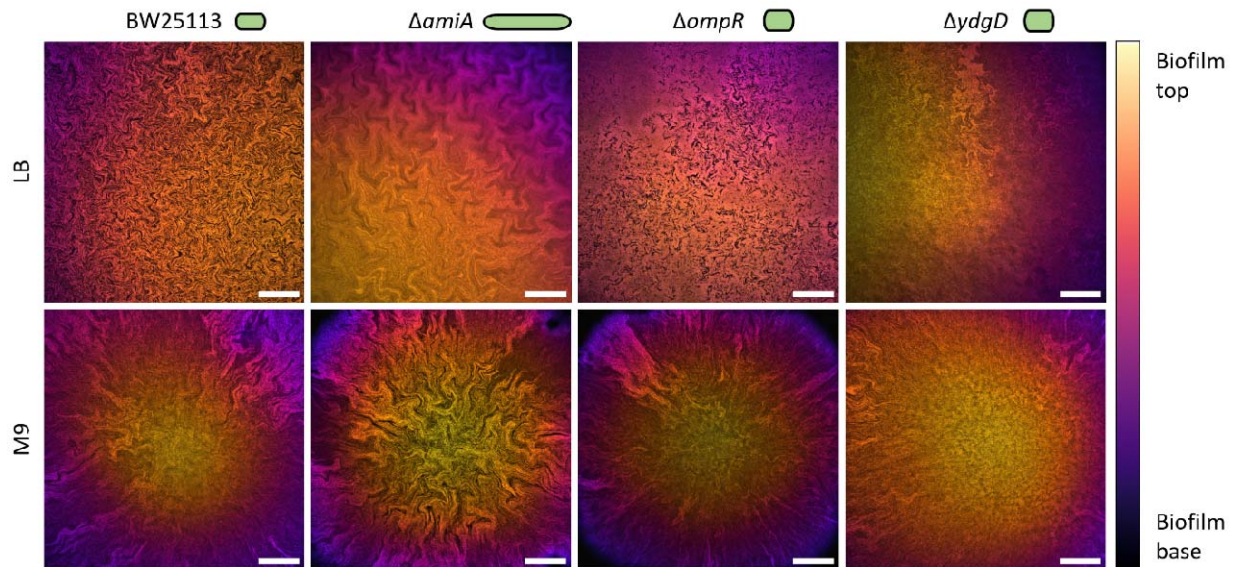

85  
86 Figure 1: Representative confocal microscopy images showing the morphology of biofilms formed by the strains  
87 BW25113,  $\Delta amiA$ ,  $\Delta ompR$  and  $\Delta ydgD$  when growing on LB (rich) or M9 (minimal) solid medium. Images are  
88 projections of z-stacks acquired with 5  $\mu\text{m}$  slice spacing, colour-coded by depth. The cell phenotype of each strain  
89 is shown as a green cartoon for reference. Scale bars: 200  $\mu\text{m}$ .

90

## 91 2.2. Internal channel patterns in *E. coli* biofilms are fractal

92 The fractal complexity of internal biofilm patterns was quantified using relative differential box-counting  
93 (RDDB) dimension, which was calculated using the open-source plugin ComsysanJ on Fiji. Firstly, the  
94 plugin was used on four sets of computer-generated images with increasing spatial complexity (as  
95 described in the Methods), to obtain a correlation between visual complexity and RDDB dimension  
96 (Figure 2). Constant images had a RDDB dimension of 0 due to the lack of spatial features, whereas the  
97 RDDB dimension of images comprised of straight lines ranged between  $2.114 \pm 0.032$  and  $2.213 \pm 0.043$   
98 (mean  $\pm$  standard deviation). The RDDB dimension for computer-generated fractal images were  
99 calculated as between  $2.329 \pm 0.041$  and  $2.702 \pm 0.047$ , and images of randomized features had a RDDB  
100 dimension equal to 2.959, close to the theoretically possible maximum of 3.000.

101

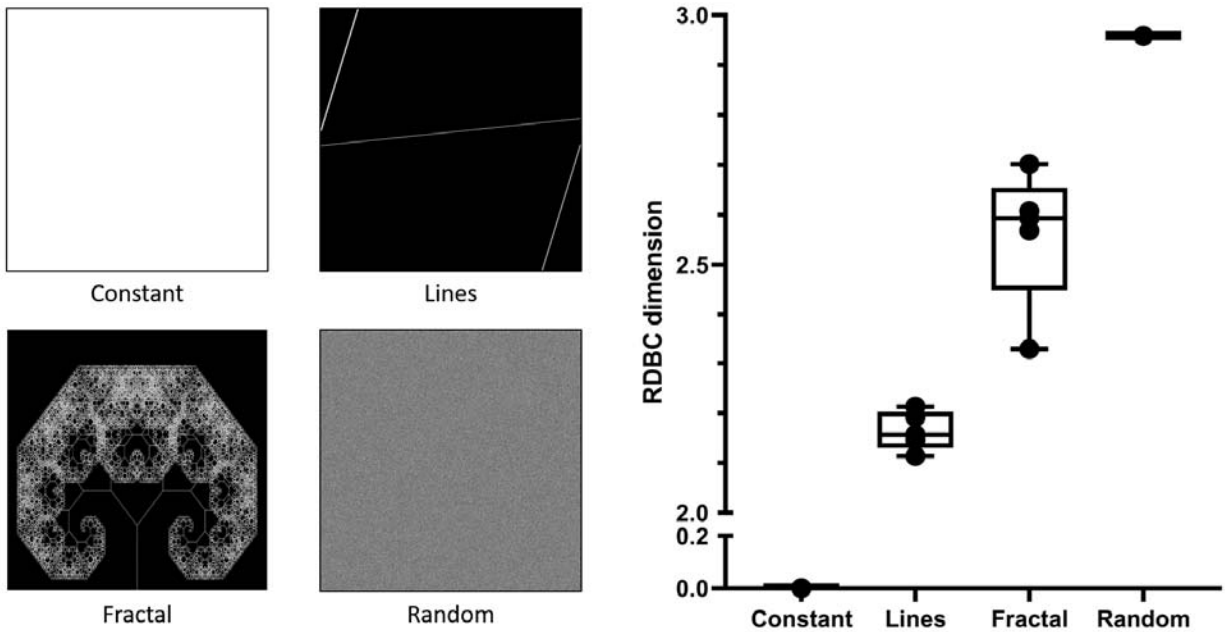

102

103 Figure 2: Representative images from the sets used for benchmarking of RDBC calculations (right panel). Each set  
104 consists of five images, whose fractal complexity is calculated using ComsysanJ. The constant, lines, and random  
105 images were generated in ComsysanJ, whereas the fractal images were obtained from open-source image  
106 repositories. Increasing complexity in the image sets is reflected by an increase in relative differential box-counting  
107 dimension, which ranges between  $2.329 \pm 0.041$  and  $2.702 \pm 0.047$  for fractal images.

108 After obtaining benchmark values for fractal complexity, confocal microscopy images of biofilms were  
109 analysed using the same image analysis pipeline to investigate the effect of cell shape and growth  
110 medium on the complexity of internal biofilm patterns (Figure 3). RDBC dimension values obtained from  
111 biofilm images fully aligned with those calculated for the set of computer-generated fractal images, with  
112 a minimum of 2.488 and a maximum of 2.620. This confirmed that channel structures in *E. coli* biofilms  
113 could be described using fractal geometry.

114 On rich medium, biofilms formed by the  $\Delta amiA$  mutant strain showed increased fractal complexity  
115 (RDBC =  $2.578 \pm 0.009$ ) when compared to biofilms formed by  $\Delta ydgD$  (RDBC =  $2.553 \pm 0.009$ ,  $p = 0.0277$ ).  
116 This reflects the peculiar channel architecture exhibited by  $\Delta amiA$  biofilms grown on LB medium (Figure  
117 1). On minimal medium, the parental strain BW25113 formed more complex biofilms (RDBC =  $2.581 \pm$   
118  $0.014$ ) than the  $\Delta ompR$  mutant (RDBC =  $2.522 \pm 0.011$ ,  $p = 0.0005$ ). Biofilms formed by the mutant  
119  $\Delta ydgD$  were also less complex (RDBC =  $2.576 \pm 0.028$ ) than those formed by  $\Delta ompR$  ( $p = 0.0013$ ), despite  
120 both strains having the same wide cell shape phenotype.

121 As shown in the image data presented in Figure 1, growth on minimal media was objectively correlated  
122 with large, dark sectors within the biofilm, which we hypothesised would result in a lower fractal  
123 complexity. However, after quantifying channel morphology through RDBC dimension and comparing  
124 each strain grown on the two different growth media we observed no statistical difference. An  
125 important exception to this observation was the  $\Delta ompR$  mutant strain, for which growth in minimal  
126 medium was associated with significantly lower morphological complexity than growth in rich medium  
127 ( $p = 0.0008$ ). This finding is investigated in more detail in the following sections.

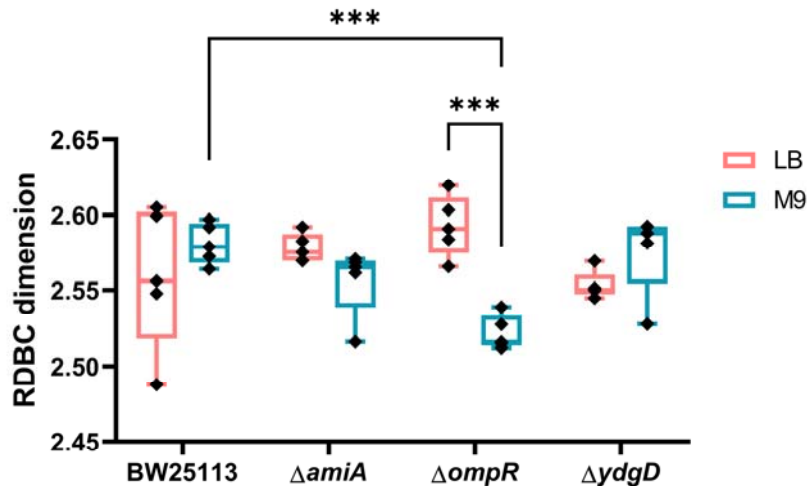

128

129 Figure 3: Box-counting dimension calculated from confocal micrographs of biofilms (n = 5 for each condition). On  
130 minimal medium (M9), biofilms formed by the  $\Delta ompR$  mutant strain are less morphologically complex than those  
131 formed by the parental strain (p = 0.0005). For the  $\Delta ompR$  mutant strain, the fractal complexity is also strongly  
132 affected by the growth substrate composition, with biofilms grown on rich medium (LB) showing significantly more  
133 complexity than those grown on minimal medium (M9, p = 0.0008). Average values are compared using one-way  
134 ANOVA tests.

135

### 136 2.3. Growth medium composition affects the complexity of $\Delta ompR$ 137 biofilms

138 We further investigated the role of medium composition on  $\Delta ompR$  biofilm internal morphology by  
139 comparing biofilms grown on LB and M9 substrates with different chemical compositions (Figure 4). The  
140 RDBC dimension of biofilms grown in rich medium decreased considerably when the substrate was  
141 made softer by halving the amount of agar (p = 0.0117). On minimal medium, on the other hand,  
142 growth on soft (1% agar) substrates was associated with a significant increase in RDBC dimension,  
143 comparable to that of biofilms grown on rich medium (p =  $2.39 \times 10^{-7}$ ).

144 Furthermore, increasing glucose amounts in minimal medium led to an increase in RDBC from  $2.376 \pm$   
145  $0.007$  (0.02% glucose) to  $2.503 \pm 0.032$  (0.2% glucose, p =  $4.81 \times 10^{-11}$ ) to  $2.543 \pm 0.005$  (0.5% glucose, p  
146 = 0.0478). In  $\Delta ompR$ , this increase in RDBC dimension coincided with the gradual disappearance of  
147 colony sectoring, brought by the increase in nutrient levels. As expected, the addition of the same  
148 amounts of glucose to rich medium did not lead to any significant changes in biofilm morphological  
149 complexity, with RDBC dimensions ( $2.520 < \text{RDBC} < 2.622$ ) comparable to those found in nominal rich  
150 medium with no glucose ( $2.566 < \text{RDBC dimension} < 2.620$ ).

151 While the diameter of  $\Delta ompR$  biofilms increased with glucose concentration and decreased with agar  
152 concentration, the presence of dark background in images of smaller biofilms did not significantly affect  
153 the resulting RDBC dimension. This was checked by digitally zooming into images of the biofilms grown  
154 on 0.02% glucose (which had the smallest base area) until they filled the field of view of the images, and  
155 by successively calculating their RDBC dimension. The resulting RDBC value was calculated as  $2.373 \pm$   
156  $0.006$ , a decrease of only 0.1% compared to the original biofilm images (Supplementary Figure 3).



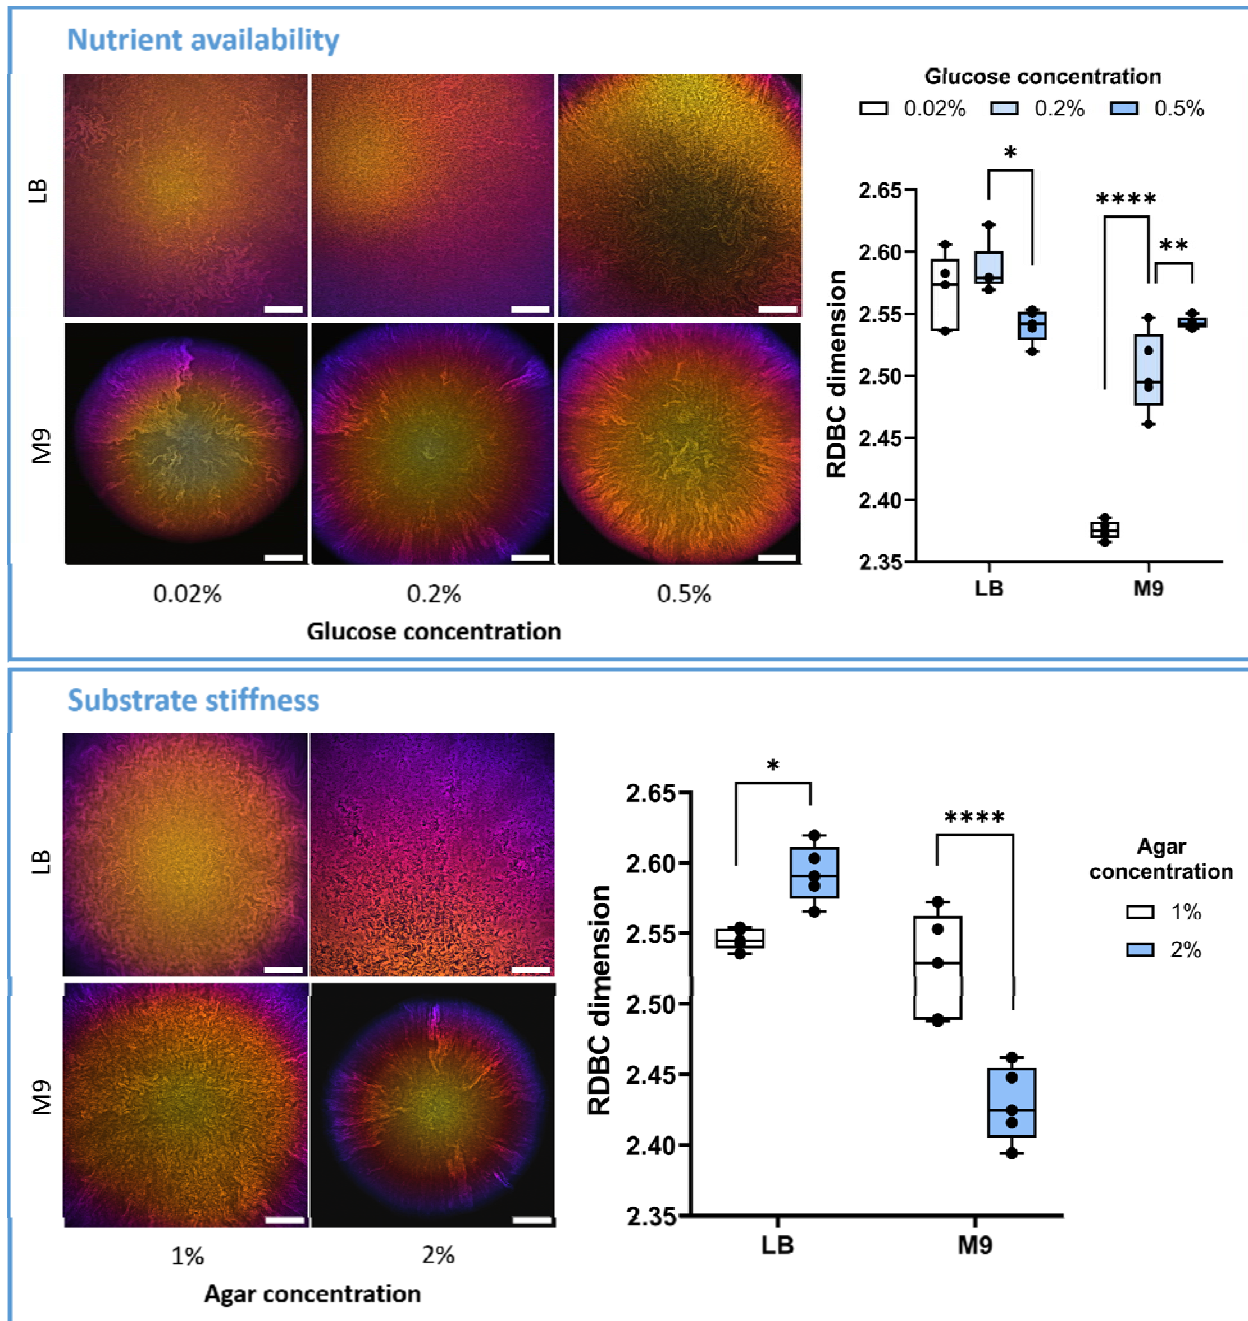

157

158 Figure 4: Morphology and fractal complexity of biofilms formed by the  $\Delta ompR$  mutant strain grown on solid  
 159 substrates with different glucose and agar concentrations. Glucose concentration in the medium is particularly  
 160 important for the complexity of biofilms grown on minimal media (M9): RDBC dimension increases when glucose  
 161 levels are increased from 0.02% to 0.2% ( $p = 4.81 \times 10^{-11}$ ) and from 0.2% to 0.5% ( $p = 0.0478$ ). On rich medium  
 162 (LB), conversely, the addition of glucose does not significantly affect biofilm fractal complexity: only a small  
 163 reduction in RDBC dimension is observed between 0.2% and 0.5% added glucose ( $p = 0.0166$ ). Finally, a reduction  
 164 in substrate stiffness from 2% to 1% agar concentration leads to a decrease in complexity on rich medium ( $p =$   
 165  $0.0365$ ) and an increase in complexity on minimal medium ( $p = 2.39 \times 10^{-7}$ ). Average values are compared using  
 166 one-way ANOVA tests. Scale bars: 200  $\mu\text{m}$ .

167 **2.4. Osmotic stress partially reduces biofilm complexity in  $\Delta ompR$**   
168 Because of the role of *ompR* in osmotic stress response, the fractal complexity of biofilms formed by the  
169 mutant strain  $\Delta ompR$  was studied on LB and M9/glucose medium with and without salt (Figure 5). A  
170 reduction in RDBC dimension was observed when the osmolality of the medium was reduced by  
171 removing salt, both in rich medium ( $p = 4.88 \times 10^{-5}$ ) and in minimal medium ( $p = 0.0209$ ). This suggested  
172 that osmotic stress might control the morphology of biofilms formed by the  $\Delta ompR$  mutant strain.  
173

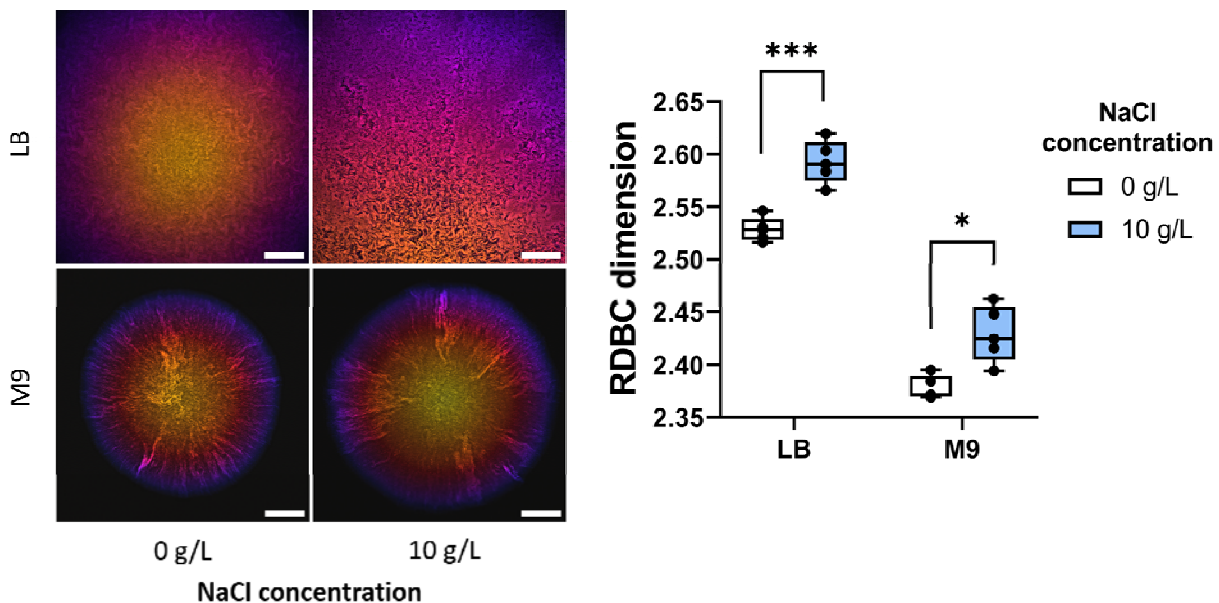

174  
175 Figure 5: Morphology and fractal complexity of biofilms formed by the  $\Delta ompR$  mutant strain grown on LB and  
176 M9/glucose solid substrates with and without NaCl. The presence of 10 g/L NaCl is associated with an increase in  
177 biofilm morphological complexity for both rich and minimal media ( $p = 7.34 \times 10^{-4}$  and  $p = 0.0209$  respectively), as  
178 indicated by the RDBC dimension metric.

179  
180 For this reason, the role of osmotic stress on the growth of the  $\Delta ompR$  mutant strain was investigated at  
181 both the cellular level and at the biofilm level. This was achieved by measuring changes in cell length  
182 and width and by measuring the RDBC dimension of biofilm images grown in solid media with different  
183 osmolalities, respectively. Changes in growth medium osmolality were induced by adding different  
184 amounts of iodixanol, a compound originally designed for density gradient preparations that cannot be  
185 metabolised by the bacteria [18]. Iodixanol toxicity in both the parental strain BW25113 and the  $\Delta ompR$   
186 mutant was checked by growth curve experiments (Supplementary Figure 4). At the cellular level, an  
187 increase in osmotic stress in the liquid growth media led to a reduction in cell size for both strains  
188 (Supplementary Figure 5). A significant reduction in cell length with increasing iodixanol concentration  
189 was observed in both strains: from  $3.520 \pm 0.827 \mu\text{m}$  to  $2.205 \pm 0.516 \mu\text{m}$  for BW25113 ( $p = 1.32 \times 10^{-167}$ ),  
190 and from  $3.878 \pm 1.133 \mu\text{m}$  to  $2.685 \pm 0.657 \mu\text{m}$  for  $\Delta ompR$  ( $p = 6.74 \times 10^{-40}$ ). By contrast, cell width  
191 reduction with increasing iodixanol concentration was marginal for BW25113 (from  $1.001 \pm 0.099 \mu\text{m}$  to  
192  $0.970 \pm 0.098 \mu\text{m}$ ,  $p = 8.57 \times 10^{-8}$ ), whereas it was almost five times higher for the  $\Delta ompR$  strain (from  
193  $1.335 \pm 0.219 \mu\text{m}$  to  $1.147 \pm 0.149 \mu\text{m}$ ,  $p = 1.02 \times 10^{-13}$ ).

194 In biofilms, an increase in iodixanol concentration in the solid growth substrate was associated with a  
195 small overall reduction in RDBC dimension for both strains (Figure 6). This loss of internal complexity  
196 could occur because planktonic growth is limited in high osmolality medium (Supplementary Figure 4),  
197 or it could be a result of the cell size reduction following osmotic stress (Supplementary Figure 5).  
198 Alternatively, it could be a pleiotropic effect caused by the presence of iodixanol in the growth medium.  
199

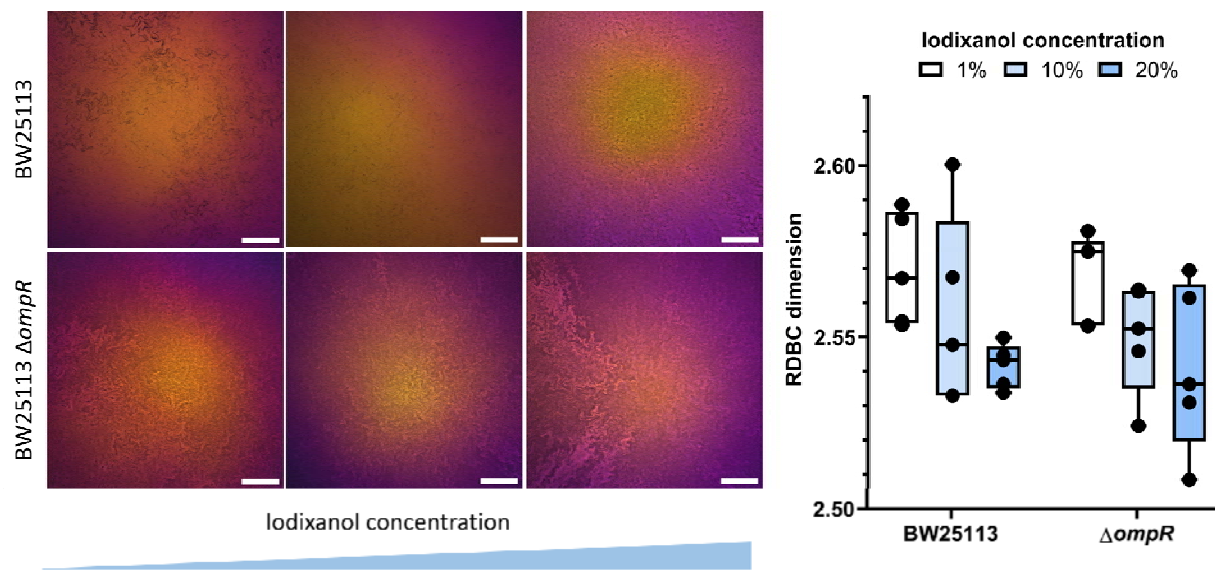

200  
201 Figure 6: Comparison of fractal morphology between biofilms formed by the parental strain BW25113 and the  
202 mutant strain  $\Delta ompR$  on solid substrates with increasing iodixanol concentrations (1%, 10% and 20% v/v). Biofilm  
203 images are colour-coded by depth. Average RDBC dimension decreases with increasing amounts of iodixanol and is  
204 similar between the two strains for each iodixanol concentration. Scale bars: 200  $\mu$ m.

205

### 206 3. Discussion

207 The formation of intra-colony channel networks is an emergent property of *E. coli* biofilms, where these  
208 channels constitute a novel nutrient uptake system [16]. The chemical makeup of the growth  
209 environment is known to affect the density and the size of these channels within the biofilm [17],  
210 however the factors controlling channel morphogenesis are currently unknown. A method for the  
211 systematic, quantitative characterisation of channel morphology is therefore needed to elucidate the  
212 mechanisms governing channel formation.

213 In this study, we analysed the effect of cell shape mutations and growth medium composition on the  
214 morphological complexity of *E. coli* biofilms using confocal microscopy and image analysis. We showed  
215 that the fractal morphology of *E. coli* nutrient transport channels was comparable to that of computer-  
216 generated fractals for all cell shape mutants and growth conditions. While cell shape affected the overall  
217 biofilm morphology, this did not lead to a significant change in fractal complexity, as described by the  
218 RDBC dimension metric. However, the wide-cell mutant strain  $\Delta ompR$  formed biofilms with a higher  
219 RDBC dimension on nutrient excess than on nutrient limited conditions.



220 To investigate the cause of this phenomenon, we examined the effect of growth medium composition  
221 on  $\Delta ompR$  biofilm fractal complexity. We found that glucose concentration was particularly important in  
222 minimal medium, where it constituted the sole carbon source. Increasing glucose concentrations in  
223 minimal medium led to proportionally more complex biofilm channel organisation, eventually reaching a  
224 RDBC dimension value close to that of biofilms grown on rich media. A similar effect was previously  
225 observed in *E. coli* JM105 mini-Tn7-*gfp* biofilms, which developed more complex channel patterns when  
226 grown on minimal medium with an excess of glucose compared to glucose-limited substrates [17].  
227 Furthermore, we found that growth on rich soft substrates reduced biofilm morphological complexity,  
228 whereas growth on soft minimal substrates increased it. This is in contrast with previous findings on *E.*  
229 *coli* JM105 mini-Tn7-*gfp*, where channels from biofilms grown on rich, soft substrates were densely  
230 packed [17].

231 We investigated the morphology of  $\Delta ompR$  cells and biofilms under growth conditions with varying  
232 osmolality owing to the role of OmpR in regulating the osmotic stress response in *E. coli* [19]. Gram-  
233 negative bacteria such as *E. coli* respond to an increase in external osmotic pressure by accumulating  
234 solutes inside the cell, and by pumping out water through efflux [20]. Hyperosmotic shock also leads to a  
235 sudden cell volume shrinkage [21], followed by a gradual recovery [22], and is associated with a  
236 reduction in cell elongation rate [23]. We investigated the effect of medium osmolality on biofilm  
237 morphology by comparing RDBC dimension values between biofilms grown on solid substrates with and  
238 without NaCl, and we found that low osmolality was associated with a lower fractal complexity on both  
239 rich and minimal media. Because NaCl affects not only medium osmolality, but also nutrient metabolism  
240 [24], we then used iodixanol for subsequent osmotic stress experiments. The observed reduction in  
241  $\Delta ompR$  cell width in high osmolality medium indicates a possible partial reversion to the parental  
242 phenotype, which could equally be driven by *ompR* suppressor mutations. This phenotypic reversion in  
243 cell shape may also explain the similarity in absolute RDBC dimension values between BW25113 and  
244  $\Delta ompR$  biofilms at each iodixanol concentration.

245 The extraction of fractal geometry parameters from biofilm micrographs (see for example [25]) is usually  
246 achieved by image thresholding, a type of image segmentation which isolates an object from its  
247 background depending on its grayscale value [26]. While this method can accurately identify biofilm  
248 outlines, it is not effective for the detection of internal channel networks, where difference in grayscale  
249 values between the channels and the rest of the biofilm is small. In our work, this obstacle is overcome  
250 using the fractal analysis software ComsysanJ. The use of fractal geometry has proven to be a simple  
251 yet powerful method for the quantification of *E. coli* biofilm internal channels formed by cell shape  
252 mutants on different growth substrates. Our analysis could help identify the factors controlling the  
253 formation and development of nutrient-transporting channels in *E. coli*, and it could be readily applied  
254 to other microbial species exhibiting complex biofilm internal patterns.

255

## 256 4. Materials and methods

### 257 4.1. Strains and media

258 The bacterial strains used in this work (Supplementary Table 1) were obtained from the Keio collection  
259 [27], a single-gene knockout library of all nonessential genes in the *E. coli* K-12 strain, BW25113 [28]. The  
260 mutants  $\Delta amiA::kan$ ,  $\Delta ompR::kan$  and  $\Delta ydgD::kan$  of the *E. coli* strain BW25113, hereby referred to as

261 *ΔamiA*, *ΔompR* and *ΔydgD*, were selected for their modified cell phenotype, and their single-gene  
262 deletions were verified by PCR and DNA amplicon sequencing (Supplementary Table 2). The strains were  
263 transformed by electroporation with the plasmid pAJR145, which is derived from the plasmid pACYC184  
264 and encodes the constitutively-expressed green fluorescent protein (GFP) transcriptional fusion  
265 *rpsM::gfp+* [29]. Prior to transformation, liquid cultures of each strain were made electrocompetent  
266 through three ice-cold 10% glycerol washes.

267 Liquid cultures were grown overnight in a 37°C aerated incubator while shaking at 250 rpm, in Miller  
268 Lysogeny Broth (LB) [30] with the addition of 25 µg/mL chloramphenicol to maintain GFP fluorescence  
269 from the pAJR145 plasmid. Keio mutant strains were also grown with the addition of 50 µg/mL  
270 kanamycin. M9 minimal medium salts [30] were prepared as a 5× solution, then diluted to 1× with  
271 distilled deionised water and supplemented with 1 mM MgSO<sub>4</sub>·7H<sub>2</sub>O, 0.2% (w/v) glucose and 0.00005%  
272 (w/v) thiamine. Solid substrates were prepared by adding 20 g/L of agar and were grown in a 37°C static  
273 aerated incubator.

274 Solid growth substrates were also prepared with different nutritional profiles and agar concentrations to  
275 quantify the resulting change in internal morphology of *ΔompR* biofilms. No-salt agar substrates were  
276 prepared without NaCl, and soft agar substrates were prepared by reducing the amount of agar to 10  
277 g/L. D-Glucose was added to both LB and M9 media to final concentrations of 0.02% (w/v), 0.2% (w/v) or  
278 0.5% (w/v).

279

## 280 4.2. Growth characterisation of BW25113 and *ΔompR* in high osmolality 281 medium

282 The growth of the parental strain BW25113 and of the mutant strain *ΔompR* in liquid medium were  
283 characterised using a plate reader. LB broth was prepared with iodixanol concentrations of 0%, 1%, 2%,  
284 5%, 10% and 20% (v/v) by adding appropriate amounts of an OptiPrep 60% (w/v) iodixanol stock  
285 solution (Sigma-Aldrich, USA). Ten wells of a 96-well plate were then filled with 200 µL of medium with  
286 each iodixanol concentration (corresponding to five biological replicates for each strain). Overnight  
287 cultures of BW25113 and of the *ΔompR* mutant strain were prepared in LB broth as described above and  
288 were diluted to a starting OD<sub>600</sub> of 0.01. The plate was then loaded with the lid on onto a pre-warmed  
289 (37°C) Synergy HT plate reader (BioTek, USA), where the OD<sub>600</sub> of the cultures was measured every 15  
290 minutes for 24 hours while the plate was shaking continuously at medium speed.

291 Growth curves were plotted in Prism by exporting data from the Gen5 microplate software (BioTek,  
292 USA), with the y axis plotted on a logarithmic scale. Specific growth rates were calculated as the slope of  
293 the linear region of the semi-logarithmic plot using the equation

$$\mu = 2.303(\log_{10}N - \log_{10}N_0)/(t - t_0)$$

294  $N_0$  and  $N$  are the cell numbers at the beginning and at the end of the exponential growth phase,  
295 respectively, and correspond to optical density readings, and  $t_0$  and  $t$  are the times at which exponential  
296 growth phase starts and ends, respectively [31].

297 To compare cell shape phenotype before and after growth in high osmolality medium, BW25113 and  
298 *ΔompR* were first grown as liquid cultures overnight in LB broth. They were then diluted 1:100 in both LB

299 broth and LB broth with 20% (v/v) iodixanol with LB salts increased proportionally, and were incubated  
300 further in a 37°C aerated incubator while shaking at 250 rpm until mid-exponential growth phase,  
301 before imaging using phase contrast microscopy as described below. Solid LB medium plates were  
302 prepared with iodixanol concentrations of 1%, 10% and 20% (v/v), and used as substrates for the growth  
303 of BW25113 and  $\Delta ompR$  biofilms.

304

### 305 4.3. Single-cell phase contrast microscopy

306 For single-cell imaging, overnight cultures of each strain in LB broth were diluted 1:100 and incubated  
307 for two hours until they reached mid-exponential growth phase ( $OD_{600} = 0.4-0.6$ ). Imaging slides were  
308 prepared by sandwiching 1 mL of molten 1% agarose between two microscope slides and letting it  
309 solidify at room temperature. After removing the top slide, 10  $\mu$ L of liquid culture was spotted onto the  
310 solidified agarose pads, and a coverslip was added prior to imaging. Single-cell phase contrast images  
311 were acquired for both non-fluorescent strains (BW25113, BW25113  $\Delta amiA::kan$ , BW25113  
312  $\Delta ompR::kan$ , BW25113  $\Delta ydgD::kan$ ) and fluorescent strains (BW25113 / pAJR145, BW25113  $\Delta amiA::kan$   
313 / pAJR145, BW25113  $\Delta ompR::kan$  / pAJR145, BW25113  $\Delta ydgD::kan$  / pAJR145), to ensure that the  
314 addition of chloramphenicol required for the maintenance of the pAJR145 plasmid did not affect the cell  
315 phenotype of each strain.

316 Single cell imaging was carried out using an Eclipse E600 upright widefield microscope (Nikon, Japan) in  
317 phase contrast mode equipped with a 100x/1.30 DLL oil immersion lens (Nikon, Japan). Illumination was  
318 provided by a halogen lamp and the image was detected using a Hamamatsu ORCA 100 digital camera  
319 (Hamamatsu, Japan).

320

### 321 4.4. Biofilm confocal microscopy

322 The GFP-expressing strains BW25113 / pAJR145, BW25113  $\Delta amiA::kan$  / pAJR145, BW25113  
323  $\Delta ompR::kan$  / pAJR145 and BW25113  $\Delta ydgD::kan$  / pAJR145 were grown into mature biofilms on agar  
324 substrates in a sterile 3D-printed plastic specimen holder, as described previously [16]. Biofilms were  
325 grown for 24 hours when using LB medium, and for 48 hours when using M9 medium.

326 Mature biofilm images were acquired on an Olympus IX81 microscope coupled to a FluoView FV1000  
327 confocal laser scanning unit (Olympus, Japan). Fluorescence from GFP was excited using a 488 nm argon  
328 laser (GLG3135, Showa Optronics, Japan) and was detected by a PMT with a spectral detection window  
329 set between wavelengths of 510 and 560 nm. Samples were imaged using a 10x/0.4 N.A. air objective  
330 lens for resolving intra-colony channels.

331 Three-dimensional z-stacks of biofilms grown on LB and M9 media were acquired with a slice spacing of  
332 5  $\mu$ m for Nyquist sampling in the axial dimension. Five different colony biofilms were imaged for each  
333 condition.

334

### 335 4.5. Image analysis

336 Phase-contrast images of both fluorescent and non-fluorescent cells were first pre-processed in FIJI  
337 using the background subtraction tool with a rolling ball radius of 15 pixels, with the “light background”

338 option selected. The images were then analysed using the Fiji plugin MicrobeJ [32] to obtain cell length  
339 and width measurements. Segmentation was performed using MicrobeJ with the default settings for a  
340 bright background and the “medial axis” mode of detection. The following changes to the default  
341 parameter ranges were made: area [1-max]  $\mu\text{m}^2$ ; width [0-max]  $\mu\text{m}$  with variation [0-0.2]; sinuosity [1-  
342 1.2]; angularity [0-0.5] rad; solidity [0.9-max]. The default “advanced” parameters were changed to have  
343 an area cut-off of 1000, and a count cut-off of 250. The options “exclude on edges” and “shape  
344 descriptors” were selected. Phase contrast images were analysed ( $n = 10$  for each strain), with a total  
345 number of analysed cells between 202 and 665 (non-fluorescent cells) and between 90 and 524  
346 (fluorescent cells).

347 Biofilm image z-stacks were displayed as hyperstacks, and colour-coded by depth using the “fire” lookup  
348 table on Fiji. Biofilms images were contrast-adjusted where needed for presentation purposes, using  
349 Contrast Limited Adaptive Histogram Equalization (CLAHE, [33]) available in Fiji with block size 60,  
350 maximum slope 3 and 256 histogram bins. Regions of interest (ROIs) in biofilm images were despeckled  
351 using the “noise – despeckle” function in Fiji.

352

#### 353 4.6. Fractal complexity quantification

354 Fractal complexity was quantified using the Fiji plugin ComsystanJ (Complex Systems Analysis for  
355 ImageJ) [34], version 1.0.0 (<https://github.com/comsystan/comsystan>). The “2D image” version of the  
356 plugin was used on the images, all of which had a size of 2048 x 2048 pixels. Box-counting fractal  
357 dimension was calculated using the Relative Differential Box Counting (RDBC) algorithm developed by  
358 Jin et al. [35] which uses a raster box scanning method. The plugin was run with 12 boxes and 1-12  
359 regressions.

360 Firstly, four sets of sample images were analysed. Three of the sets were generated as grayscale images  
361 through ComsystanJ using the “2D image Image Generator” option, with image types “Constant”,  
362 “Fractal random shapes – Lines” and “Random”. Constant images had a constant pixel intensity value  
363 (256) throughout each image. Line images were made of light (pixel intensity = 256) lines with varying  
364 thickness randomly intersecting on a dark (pixel intensity = 0) background. Fractal images were obtained  
365 from the “Wikimedia commons” open-source image repository [36]–[40]. Finally, in Random images  
366 every pixel had a random intensity value (between 0 and 256).

367 For biofilm fractal pattern analysis, z-stacks were converted to 8-bit. No contrast-adjustment was used  
368 on the images prior to analysis.

369

#### 370 4.7. Statistical analysis

371 Statistical tests were carried out on Prism version 8.0.2 (GraphPad Software, USA). Cell measurements  
372 (length and width) of the mutant strains were compared to those of the parental strain BW25113 using  
373 a Kruskal-Wallis multiple comparisons test. One-way ANOVA tests were used to compare box-counting  
374 dimensions of biofilms formed by different strains in the same media and also to compare box-counting  
375 dimensions of the same strain grown in different media.

376 In the main text and figure captions, values are presented as mean  $\pm$  standard deviation. In all plots,  
377 produced using Prism version 8.0.2, p-values are presented as \* ( $p < 0.05$ ); \*\* ( $p < 0.005$ ); \*\*\* ( $p <$   
378  $0.0005$ ); \*\*\*\* ( $p < 0.0001$ ), with specific p-values written in the figure captions.

379

## 380 5. CRediT authorship contribution statement

381 **Beatrice Bottura**: Conceptualisation, Methodology, Validation, Formal Analysis, Investigation,  
382 Resources, Data Curation, Writing – Original Draft, Writing – Review & Editing, Visualisation.

383 **Liam M. Rooney**: Conceptualisation, Methodology, Resources, Writing – Review & Editing.

384 **Morgan Feeney**: Methodology, Supervision, Writing – Review & Editing

385 **Paul A. Hoskisson**: Conceptualisation, Methodology, Writing – Review & Editing, Resources, Supervision,  
386 Project Administration, Funding Acquisition.

387 **Gail McConnell**: Conceptualisation, Methodology, Writing – Review & Editing, Resources, Supervision,  
388 Project Administration, Resources, Funding Acquisition.

389

## 390 6. Declaration of competing interest

391 The authors declare that they have no known competing financial interests or personal relationships  
392 that could have appeared to influence the work reported in this paper.

393

## 394 7. Acknowledgements

395 We thank Dr Manuel Banzhaf (University of Birmingham) for the gift of the Keio collection mutants. We  
396 also thank Dr Ainsley Beaton (John Innes Centre, Norwich), Dr Rebecca McHugh and Dr David Mark  
397 (University of Glasgow), Robyn Braes, Elmira Mohit and James Croxford (University of Strathclyde) for  
398 helpful discussions.

399 Beatrice Bottura is supported by a University of Strathclyde Student Excellence Award. Liam Rooney is  
400 supported by The Leverhulme Trust. Gail McConnell is funded by the Medical Research Council  
401 (MR/K015583/1), the Biological Sciences Research Council (BB/T011602/1 and The Leverhulme Trust.  
402 Paul A. Hoskisson is supported by BBSRC (BB/T001038/1 and BB/T004126/1), MRC (MR/V011499/1), The  
403 Leverhulme Trust and the Royal Academy of Engineering Research Chair Scheme for long term personal  
404 research support (RCSRF2021\11\15).

405 For the purpose of open access, the author(s) has applied a Creative Commons Attribution (CC BY)  
406 licence to any Author Accepted Manuscript version arising from this submission.

407

408

## 409 References

410 [1] B. L. Hogan, 'Morphogenesis', *Cell*, vol. 96, no. 2, pp. 225–233, 1999.



- 411 [2] L. Eigentler, F. A. Davidson, and N. R. Stanley-Wall, 'Mechanisms driving spatial distribution of  
412 residents in colony biofilms: an interdisciplinary perspective', *Open Biol.*, vol. 12, no. 12, p. 220194,  
413 2022.
- 414 [3] M. Obert, P. Pfeifer, and M. Sernetz, 'Microbial growth patterns described by fractal geometry', *J.*  
415 *Bacteriol.*, vol. 172, no. 3, pp. 1180–1185, 1990.
- 416 [4] S. Hermanowicz, U. Schindler, and P. Wilderer, 'Fractal structure of biofilms: new tools for  
417 investigation of morphology', *Water Sci. Technol.*, vol. 32, no. 8, pp. 99–105, 1995.
- 418 [5] A. Moreau, G. Lorite, C. Rodrigues, A. Souza, and M. Cotta, 'Fractal analysis of *Xylella fastidiosa*  
419 biofilm formation', *J. Appl. Phys.*, vol. 106, no. 2, 2009.
- 420 [6] H. Beyenal, C. Donovan, Z. Lewandowski, and G. Harkin, 'Three-dimensional biofilm structure  
421 quantification', *J. Microbiol. Methods*, vol. 59, no. 3, pp. 395–413, 2004.
- 422 [7] T. Matsuyama and M. Matsushita, 'Self-similar colony morphogenesis by gram-negative rods as the  
423 experimental model of fractal growth by a cell population', *Appl. Environ. Microbiol.*, vol. 58, no. 4,  
424 pp. 1227–1232, 1992.
- 425 [8] J. Wang, X. Li, R. Kong, J. Wu, and X. Wang, 'Fractal morphology facilitates *Bacillus subtilis* biofilm  
426 growth', *Environ. Sci. Pollut. Res.*, vol. 29, no. 37, pp. 56168–56177, 2022.
- 427 [9] D. Tomoiaga, J. Bubnell, L. Herndon, and P. Feinstein, 'High rates of plasmid cotransformation in *E.*  
428 *coli* overturn the clonality myth and reveal colony development', *Sci. Rep.*, vol. 12, no. 1, pp. 1–15,  
429 2022.
- 430 [10] I. N. Nuñez *et al.*, 'Artificial symmetry-breaking for morphogenetic engineering bacterial colonies',  
431 *ACS Synth. Biol.*, vol. 6, no. 2, pp. 256–265, 2017.
- 432 [11] T. J. Rudge, F. Federici, P. J. Steiner, A. Kan, and J. Haseloff, 'Cell polarity-driven instability generates  
433 self-organized, fractal patterning of cell layers', *ACS Synth. Biol.*, vol. 2, no. 12, pp. 705–714, 2013.
- 434 [12] M. Gralka, F. Stiewe, F. Farrell, W. Möbius, B. Waclaw, and O. Hallatschek, 'Allele surfing promotes  
435 microbial adaptation from standing variation', *Ecol. Lett.*, vol. 19, no. 8, pp. 889–898, 2016.
- 436 [13] J. Kayser, C. F. Schreck, Q. Yu, M. Gralka, and O. Hallatschek, 'Emergence of evolutionary driving  
437 forces in pattern-forming microbial populations', *Philos. Trans. R. Soc. B Biol. Sci.*, vol. 373, no. 1747,  
438 p. 20170106, 2018.
- 439 [14] B. Borer, D. Ciccacese, D. Johnson, and D. Or, 'Spatial organization in microbial range expansion  
440 emerges from trophic dependencies and successful lineages', *Commun. Biol.*, vol. 3, no. 1, p. 685,  
441 2020.
- 442 [15] D. R. Amor, R. Montañez, S. Duran-Nebreda, and R. Solé, 'Spatial dynamics of synthetic microbial  
443 mutualists and their parasites', *PLoS Comput. Biol.*, vol. 13, no. 8, p. e1005689, 2017.
- 444 [16] L. M. Rooney, W. B. Amos, P. A. Hoskisson, and G. McConnell, 'Intra-colony channels in *E. coli*  
445 function as a nutrient uptake system', *ISME J.*, vol. 14, no. 10, pp. 2461–2473, 2020, doi:  
446 10.1038/s41396-020-0700-9.
- 447 [17] B. Bottura, L. M. Rooney, P. A. Hoskisson, and G. McConnell, 'Intra-colony channel morphology in  
448 *Escherichia coli* biofilms is governed by nutrient availability and substrate stiffness', *Biofilm*, vol. 4, p.  
449 100084, 2022.
- 450 [18] T. Ford, J. Graham, and D. Rickwood, 'Iodixanol: a nonionic iso-osmotic centrifugation medium for  
451 the formation of self-generated gradients', *Anal. Biochem.*, vol. 220, no. 2, pp. 360–366, 1994.
- 452 [19] S. Chakraborty and L. J. Kenney, 'A new role of OmpR in acid and osmotic stress in *Salmonella* and *E.*  
453 *coli*', *Front. Microbiol.*, vol. 9, p. 2656, 2018.
- 454 [20] J. M. Wood, 'Perspectives on: the response to osmotic challenges: bacterial responses to osmotic  
455 challenges', *J. Gen. Physiol.*, vol. 145, no. 5, p. 381, 2015.
- 456 [21] X. Dai and M. Zhu, 'High osmolarity modulates bacterial cell size through reducing initiation volume  
457 in *Escherichia coli*', *Mosphere*, vol. 3, no. 5, pp. e00430-18, 2018.

- 458 [22] R. Buda *et al.*, 'Dynamics of Escherichia coli's passive response to a sudden decrease in external  
459 osmolarity', *Proc. Natl. Acad. Sci.*, vol. 113, no. 40, pp. E5838–E5846, 2016.
- 460 [23] E. Rojas, J. A. Theriot, and K. C. Huang, 'Response of Escherichia coli growth rate to osmotic shock',  
461 *Proc. Natl. Acad. Sci.*, vol. 111, no. 21, pp. 7807–7812, 2014.
- 462 [24] F. Li *et al.*, 'Effects of NaCl concentrations on growth patterns, phenotypes associated with  
463 virulence, and energy metabolism in Escherichia coli BW25113', *Front. Microbiol.*, vol. 12, p. 705326,  
464 2021.
- 465 [25] Z. Ji, K. J. Card, and F. B. Dazzo, 'CMEIAS JFrad: a digital computing tool to discriminate the fractal  
466 geometry of landscape architectures and spatial patterns of individual cells in microbial biofilms',  
467 *Microb. Ecol.*, vol. 69, pp. 710–720, 2015.
- 468 [26] J. Kittler and J. Illingworth, 'Minimum error thresholding', *Pattern Recognit.*, vol. 19, no. 1, pp. 41–  
469 47, 1986.
- 470 [27] T. Baba *et al.*, 'Construction of Escherichia coli K-12 in-frame, single-gene knockout mutants: the  
471 Keio collection', *Mol. Syst. Biol.*, vol. 2, no. 1, pp. 2006–0008, 2006.
- 472 [28] K. A. Datsenko and B. L. Wanner, 'One-step inactivation of chromosomal genes in Escherichia coli K-  
473 12 using PCR products', *Proc. Natl. Acad. Sci.*, vol. 97, no. 12, pp. 6640–6645, 2000.
- 474 [29] A. J. Roe *et al.*, 'Co-ordinate single-cell expression of LEE4-and LEE5-encoded proteins of Escherichia  
475 coli O157: H7', *Mol. Microbiol.*, vol. 54, no. 2, pp. 337–352, 2004.
- 476 [30] K. L. Elbing and R. Brent, 'Recipes and tools for culture of Escherichia coli', *Curr. Protoc. Mol. Biol.*,  
477 vol. 125, no. 1, p. e83, 2019, doi: 10.1002/cpmb.83.
- 478 [31] A. K. Camper, G. A. McFeters, W. G. Characklis, and W. L. Jones, 'Growth kinetics of coliform  
479 bacteria under conditions relevant to drinking water distribution systems', *Appl. Environ. Microbiol.*,  
480 vol. 57, no. 8, pp. 2233–2239, 1991.
- 481 [32] A. Ducret, E. M. Quardokus, and Y. V. Brun, 'MicrobeJ, a tool for high throughput bacterial cell  
482 detection and quantitative analysis', *Nat. Microbiol.*, vol. 1, no. 7, pp. 1–7, 2016.
- 483 [33] K. Zuiderveld, 'Contrast limited adaptive histogram equalization', in *Graphics Gems*, Academic Press,  
484 1994, pp. 474–485.
- 485 [34] H. Ahammer *et al.*, 'ComsysanJ: A collection of Fiji/ImageJ2 plugins for nonlinear and complexity  
486 analysis in 1D, 2D and 3D', *Plos One*, vol. 18, no. 10, p. e0292217, 2023.
- 487 [35] X. Jin, S. Ong, and others, 'A practical method for estimating fractal dimension', *Pattern Recognit.*  
488 *Lett.*, vol. 16, no. 5, pp. 457–464, 1995.
- 489 [36] 'Koch Curve in Three Dimensions ("Delta" fractal).jpg - Wikipedia'. 2014. Accessed: Nov. 16, 2023.  
490 [Online]. Available:  
491 [https://commons.wikimedia.org/wiki/File:Koch\\_Curve\\_in\\_Three\\_Dimensions\\_\(%22Delta%22\\_fracta](https://commons.wikimedia.org/wiki/File:Koch_Curve_in_Three_Dimensions_(%22Delta%22_fractal).jpg)  
492 [l\).jpg](https://commons.wikimedia.org/wiki/File:Koch_Curve_in_Three_Dimensions_(%22Delta%22_fractal).jpg)
- 493 [37] 'Mandel zoom 00 mandelbrot set.jpg - Wikipedia'. 2013. Accessed: Nov. 16, 2023. [Online].  
494 Available: [https://commons.wikimedia.org/wiki/File:Mandel\\_zoom\\_00\\_mandelbrot\\_set.jpg](https://commons.wikimedia.org/wiki/File:Mandel_zoom_00_mandelbrot_set.jpg)
- 495 [38] 'BenMiriello/fun-with-fractals - GitHub Repository'. 2020. Accessed: Nov. 16, 2023. [Online].  
496 Available: <https://github.com/BenMiriello/fun-with-fractals>
- 497 [39] 'Cubic starfish Julia set.png - Wikipedia'. 2021. Accessed: Nov. 16, 2023. [Online]. Available:  
498 [https://commons.wikimedia.org/wiki/File:Cubic\\_starfish\\_Julia\\_set.png](https://commons.wikimedia.org/wiki/File:Cubic_starfish_Julia_set.png)
- 499 [40] 'Xaos fractal 24.png - Wikipedia'. 2006. Accessed: Nov. 16, 2023. [Online]. Available:  
500 [https://commons.wikimedia.org/wiki/File:Xaos\\_fractal\\_24.png](https://commons.wikimedia.org/wiki/File:Xaos_fractal_24.png)
- 501
